# Supplementary material for: Long-Term Monitoring of the Antibody Response to a SARS-CoV-2 Infection
Source: MDPI journal article supplement (doi:10.3390/diagnostics11101915), 2021-10-16
Supplement: s1 [file s1]

# Supplementary Materials: Long-Term Monitoring of the Antibody Response to a SARS-CoV-2 infection

Václav Šimánek, Ladislav Pecen, Hana Řezáčková, Ondřej Topolčan, Karel Fajfrlík, Dalibor Sedláček, Robin Šín, Monika Bludovská, Petr Pazdiora, David Slouka and Radek Kučera

## S1. Results

Suppl. Figure S1 is a visualization of the mean-course plot of antibody levels by age. Antibody levels follow a different course in different age groups. However, these differences were not statistically significant (*note: if variability is not shown in the figure below that is an indication that only one measurement was taken per group/point in time*).

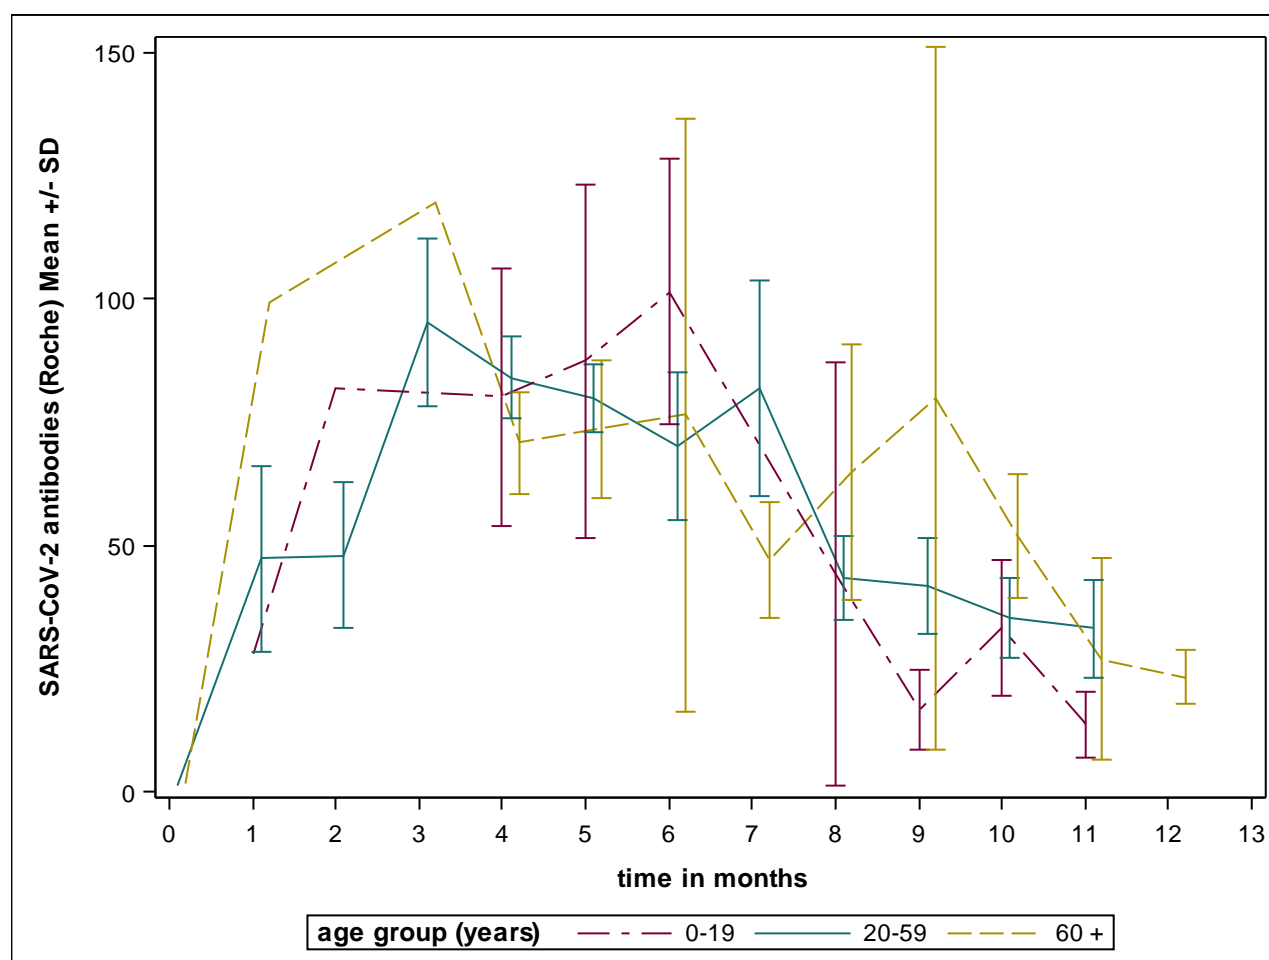

Suppl. Figure S1. Anti-SARS-CoV-2 Total Ig Roche – summary statistics by age category

Suppl. Table S1 shows the division into the age groups with the goal of differentiating between children and adolescents, adults and elderly populations. The division into three individual categories was as follows: Age 0-19, children + adolescents: 11.82%; Age 20-59, adults: 67.27%; Age 60+, elderly population: 20.91%.

**Suppl. Table S1.** Anti-SARS-CoV-2 Total Ig Roche – summary statistics divided into age category

| Analysis Variable: SARS-CoV-2 antibodies (Roche) |                |    |       |         |        |         |         |
|--------------------------------------------------|----------------|----|-------|---------|--------|---------|---------|
| age group (years)                                | time in months | N  | Mean  | Std Dev | Median | Minimum | Maximum |
| 0-19                                             | 1              | 1  | 27.9  | .       | 27.9   | 27.9    | 27.9    |
|                                                  | 2              | 1  | 81.9  | .       | 81.9   | 81.9    | 81.9    |
|                                                  | 4              | 4  | 80.1  | 52.4    | 79.1   | 18.9    | 143.4   |
|                                                  | 5              | 4  | 87.4  | 71.3    | 85.2   | 2.3     | 176.8   |
|                                                  | 6              | 6  | 101.4 | 66.1    | 98.4   | 35.2    | 189.8   |
|                                                  | 8              | 2  | 44.2  | 60.8    | 44.2   | 1.3     | 87.2    |
|                                                  | 9              | 3  | 16.6  | 13.9    | 14.4   | 3.9     | 31.4    |
|                                                  | 10             | 4  | 33.1  | 27.5    | 30.6   | 8.9     | 62.6    |
|                                                  | 11             | 4  | 13.7  | 13.0    | 11.8   | 0.6     | 30.5    |
| 20-59                                            | 0              | 1  | 1.5   | .       | 1.5    | 1.5     | 1.5     |
|                                                  | 1              | 5  | 47.3  | 42.2    | 40.1   | 8.4     | 118.8   |
|                                                  | 2              | 7  | 48.0  | 39.1    | 37.6   | 8.8     | 104.6   |
|                                                  | 3              | 5  | 95.3  | 37.8    | 112.8  | 34.3    | 124.4   |
|                                                  | 4              | 24 | 84.1  | 39.8    | 80.5   | 2.9     | 146.9   |
|                                                  | 5              | 39 | 79.7  | 43.4    | 83.8   | 4.6     | 177.2   |
|                                                  | 6              | 10 | 70.1  | 47.6    | 63.4   | 9.9     | 169.4   |
|                                                  | 7              | 9  | 81.9  | 65.4    | 65.6   | 10.9    | 195.5   |
|                                                  | 8              | 14 | 43.4  | 32.5    | 39.6   | 1.6     | 108.9   |
|                                                  | 9              | 21 | 41.7  | 44.7    | 27.8   | 5.4     | 180.0   |
|                                                  | 10             | 18 | 35.3  | 34.3    | 23.5   | 2.2     | 121.7   |
|                                                  | 11             | 9  | 33.2  | 29.4    | 33.3   | 2.1     | 92.1    |
| 60 +                                             | 0              | 1  | 1.7   | .       | 1.7    | 1.7     | 1.7     |
|                                                  | 1              | 1  | 99.2  | .       | 99.2   | 99.2    | 99.2    |
|                                                  | 3              | 1  | 119.4 | .       | 119.4  | 119.4   | 119.4   |
|                                                  | 4              | 8  | 70.9  | 29.4    | 67.4   | 21.7    | 121.7   |
|                                                  | 5              | 12 | 73.7  | 48.2    | 70.7   | 4.7     | 136.0   |
|                                                  | 6              | 2  | 76.5  | 85.0    | 76.5   | 16.4    | 136.6   |
|                                                  | 7              | 3  | 47.0  | 20.1    | 37.3   | 33.6    | 70.1    |
|                                                  | 8              | 7  | 65.0  | 68.7    | 23.1   | 4.3     | 186.6   |
|                                                  | 9              | 2  | 79.8  | 100.9   | 79.8   | 8.4     | 151.1   |
|                                                  | 10             | 10 | 51.9  | 39.4    | 47.0   | 10.5    | 130.1   |
|                                                  | 11             | 2  | 27.0  | 28.9    | 27.0   | 6.5     | 47.4    |
|                                                  | 12             | 2  | 23.3  | 7.8     | 23.3   | 17.8    | 28.8    |

Suppl. Figure S2 is a visualization of the mean course plot of antibody levels divided by gender. There are differences between the course of antibody response of males and females. These differences, however, were not statistically significant.

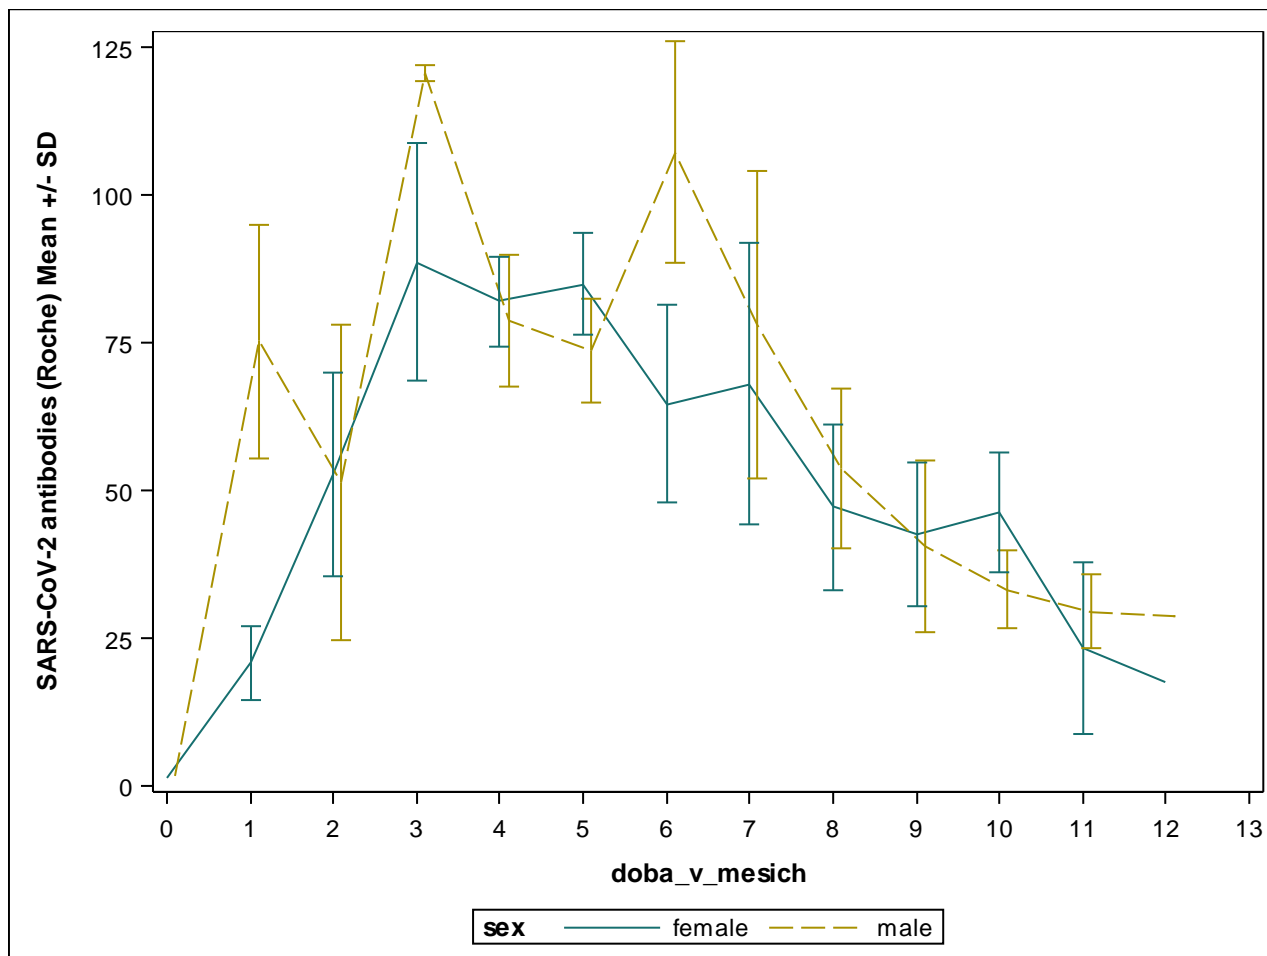

Suppl. Figure S2. Anti-SARS-CoV-2 Total Ig Roche – summary statistics by gender

Suppl. Table S2 shows the division by gender. The division into two categories was as follows: 53.6% males; 46.4% females.

**Suppl. Table S2.** Anti-SARS-CoV-2 Total Ig Roche – summary statistics by gender

| Analysis Variable: SARS-CoV-2 antibodies (Roche) |                |    |       |         |        |         |         |
|--------------------------------------------------|----------------|----|-------|---------|--------|---------|---------|
| sex                                              | time in months | N  | Mean  | Std Dev | Median | Minimum | Maximum |
| female                                           | 0              | 1  | 1.5   | .       | 1.5    | 1.5     | 1.5     |
|                                                  | 1              | 3  | 20.9  | 10.8    | 26.4   | 8.4     | 27.9    |
|                                                  | 2              | 5  | 52.8  | 38.6    | 37.6   | 16.0    | 104.6   |
|                                                  | 3              | 4  | 88.7  | 40.2    | 98.0   | 34.3    | 124.4   |
|                                                  | 4              | 21 | 82.1  | 35.3    | 80.3   | 2.9     | 146.9   |
|                                                  | 5              | 26 | 84.9  | 44.0    | 92.3   | 2.3     | 149.7   |
|                                                  | 6              | 11 | 64.7  | 55.3    | 48.7   | 9.9     | 189.8   |
|                                                  | 7              | 6  | 68.1  | 58.5    | 49.6   | 24.9    | 179.0   |
|                                                  | 8              | 13 | 47.2  | 51.0    | 33.6   | 1.3     | 186.6   |
|                                                  | 9              | 15 | 42.6  | 47.5    | 31.4   | 8.4     | 180.0   |
|                                                  | 10             | 17 | 46.3  | 41.7    | 29.1   | 2.2     | 130.1   |
|                                                  | 11             | 6  | 23.5  | 35.5    | 7.7    | 0.6     | 92.1    |
|                                                  | 12             | 1  | 17.8  | .       | 17.8   | 17.8    | 17.8    |
| male                                             | 0              | 1  | 1.7   | .       | 1.7    | 1.7     | 1.7     |
|                                                  | 1              | 4  | 75.3  | 39.8    | 71.1   | 40.1    | 118.8   |
|                                                  | 2              | 3  | 51.4  | 46.1    | 45.0   | 8.8     | 100.3   |
|                                                  | 3              | 2  | 120.7 | 1.8     | 120.7  | 119.4   | 121.9   |
|                                                  | 4              | 15 | 78.8  | 43.7    | 69.5   | 18.9    | 143.4   |
|                                                  | 5              | 29 | 73.7  | 47.4    | 73.5   | 4.6     | 177.2   |
|                                                  | 6              | 7  | 107.3 | 49.8    | 122.8  | 37.6    | 169.4   |
|                                                  | 7              | 6  | 78.2  | 63.9    | 66.9   | 10.9    | 195.5   |
|                                                  | 8              | 10 | 53.7  | 42.8    | 36.2   | 4.3     | 108.9   |
|                                                  | 9              | 11 | 40.6  | 48.5    | 13.0   | 3.9     | 151.1   |
|                                                  | 10             | 15 | 33.3  | 25.4    | 34.7   | 3.6     | 82.1    |
|                                                  | 11             | 9  | 29.6  | 19.0    | 33.3   | 6.5     | 63.7    |
|                                                  | 12             | 1  | 28.8  | .       | 28.8   | 28.8    | 28.8    |

Suppl. Table S3 shows the individual data of all 110 patients involved in the study. The lines for each patient correspond with the number of samples taken from them. The age, sex and level of anti-SARS-CoV-2 Total Ig columns are followed by the number of days and months which passed from the positive PCR test. The last column shows the date of the positive PCR test.

**Suppl. Table S3.** Individual patient data (they are also provided in the extra excel file).

| Patient No | Age | Sex    | anti-SARS-CoV-2 Total Ig Roche | Time in days from positive PCR test | Time in month from positive PCR test | Positive PCR test |
|------------|-----|--------|--------------------------------|-------------------------------------|--------------------------------------|-------------------|
| 1          | 61  | male   | 40,07                          | 146                                 | 5                                    | 25.03.2020        |
| 1          |     | male   | 22,27                          | 232                                 | 8                                    |                   |
| 1          |     | male   | 6,50                           | 330                                 | 11                                   |                   |
| 2          | 47  | female | 48,73                          | 188                                 | 6                                    | 18.03.2020        |
| 2          |     | female | 12,72                          | 335                                 | 11                                   |                   |
| 3          | 50  | male   | 78,31                          | 188                                 | 6                                    | 18.03.2020        |
| 3          |     | male   | 34,98                          | 335                                 | 11                                   |                   |
| 4          | 63  | male   | 65,29                          | 121                                 | 4                                    | 14.04.2020        |
| 4          |     | male   | 37,31                          | 213                                 | 7                                    |                   |
| 5          | 53  | female | 80,28                          | 121                                 | 4                                    | 14.04.2020        |
| 5          |     | female | 24,89                          | 213                                 | 7                                    |                   |
| 6          | 50  | male   | 18,89                          | 138                                 | 5                                    | 10.04.2020        |
| 6          |     | male   | 3,62                           | 315                                 | 10                                   |                   |
| 7          | 49  | female | 44,51                          | 138                                 | 5                                    | 10.04.2020        |
| 7          |     | female | 7,38                           | 315                                 | 10                                   |                   |
| 8          | 51  | female | 108,30                         | 139                                 | 5                                    | 28.03.2020        |
| 8          |     | female | 121,70                         | 301                                 | 10                                   |                   |
| 9          | 65  | male   | 92,27                          | 145                                 | 5                                    | 01.04.2020        |
| 9          |     | male   | 51,11                          | 314                                 | 10                                   |                   |
| 10         | 61  | female | 120,10                         | 145                                 | 5                                    | 01.04.2020        |
| 10         |     | female | 29,14                          | 314                                 | 10                                   |                   |
| 11         | 49  | male   | 40,17                          | 150                                 | 5                                    | 15.03.2020        |
| 11         |     | male   | 7,93                           | 275                                 | 9                                    |                   |
| 12         | 39  | female | 107,30                         | 150                                 | 5                                    | 15.03.2020        |
| 12         |     | female | 34,01                          | 275                                 | 9                                    |                   |
| 13         | 54  | male   | 89,16                          | 167                                 | 5                                    | 07.03.2020        |
| 13         |     | male   | 33,29                          | 333                                 | 11                                   |                   |
| 14         | 42  | female | 1,48                           | 0                                   | 0                                    | 30.09.2020        |
| 14         |     | female | 8,39                           | 20                                  | 1                                    |                   |
| 14         |     | female | 23,89                          | 58                                  | 2                                    |                   |
| 15         | 62  | male   | 4,72                           | 148                                 | 5                                    | 14.04.2020        |
| 15         |     | male   | 4,26                           | 230                                 | 8                                    |                   |
| 16         | 53  | female | 2,91                           | 125                                 | 4                                    | 26.03.2020        |
| 16         |     | female | 1,61                           | 244                                 | 8                                    |                   |
| 17         | 67  | male   | 1,72                           | 14                                  | 0                                    | 23.09.2020        |
| 17         |     | male   | 99,17                          | 37                                  | 1                                    |                   |
| 17         |     | male   | 119,40                         | 86                                  | 3                                    |                   |
| 18         | 20  | female | 80,71                          | 136                                 | 4                                    | 10.03.2020        |
| 18         |     | female | 22,99                          | 241                                 | 8                                    |                   |
| 19         | 58  | male   | 68,32                          | 138                                 | 5                                    | 14.03.2020        |
| 19         |     | male   | 26,79                          | 250                                 | 8                                    |                   |
| 20         | 59  | female | 73,29                          | 138                                 | 5                                    | 14.03.2020        |
| 20         |     | female | 27,39                          | 250                                 | 8                                    |                   |
| 21         | 73  | male   | 52,07                          | 126                                 | 4                                    | 23.04.2020        |
| 21         |     | male   | 10,70                          | 295                                 | 10                                   |                   |
| 22         | 66  | female | 64,19                          | 126                                 | 4                                    | 23.04.2020        |
| 22         |     | female | 130,10                         | 295                                 | 10                                   |                   |

|    |    |        |        |     |    |            |
|----|----|--------|--------|-----|----|------------|
| 23 | 45 | female | 96,63  | 126 | 4  | 23.04.2020 |
| 23 |    | female | 28,10  | 295 | 10 |            |
| 24 | 57 | male   | 107,90 | 164 | 5  | 21.03.2020 |
| 24 |    | male   | 37,42  | 321 | 11 |            |
| 25 | 54 | female | 139,10 | 164 | 5  | 21.03.2020 |
| 25 |    | female | 92,13  | 321 | 11 |            |
| 26 | 47 | male   | 118,80 | 45  | 1  | 11.08.2020 |
| 26 |    | male   | 123,30 | 134 | 4  |            |
| 26 |    | male   | 122,80 | 190 | 6  |            |
| 27 | 62 | male   | 121,70 | 124 | 4  | 17.04.2020 |
| 27 |    | male   | 42,93  | 293 | 10 |            |
| 28 | 56 | female | 145,00 | 110 | 4  | 15.04.2020 |
| 28 |    | female | 72,89  | 233 | 8  |            |
| 29 | 42 | female | 146,90 | 121 | 4  | 30.03.2020 |
| 29 |    | female | 93,16  | 240 | 8  |            |
| 30 | 47 | female | 132,40 | 144 | 5  | 27.03.2020 |
| 30 |    | female | 100,20 | 307 | 10 |            |
| 31 | 58 | male   | 43,04  | 42  | 1  | 15.10.2020 |
| 31 |    | male   | 33,78  | 127 | 4  |            |
| 32 | 53 | male   | 97,85  | 139 | 5  | 24.03.2020 |
| 32 |    | male   | 45,59  | 240 | 8  |            |
| 32 |    | male   | 19,34  | 336 | 11 |            |
| 33 | 14 | female | 94,75  | 118 | 4  | 08.04.2020 |
| 33 |    | female | 57,73  | 195 | 6  |            |
| 33 |    | female | 31,41  | 286 | 9  |            |
| 34 | 42 | female | 69,38  | 118 | 4  | 08.04.2020 |
| 34 |    | female | 42,18  | 195 | 6  |            |
| 34 |    | female | 16,69  | 286 | 9  |            |
| 35 | 19 | female | 63,52  | 118 | 4  | 08.04.2020 |
| 35 |    | female | 35,23  | 195 | 6  |            |
| 35 |    | female | 14,36  | 286 | 9  |            |
| 36 | 51 | male   | 63,75  | 129 | 4  | 27.03.2020 |
| 36 |    | male   | 13,00  | 262 | 9  |            |
| 37 | 55 | female | 140,10 | 129 | 4  | 27.03.2020 |
| 37 |    | female | 116,80 | 262 | 9  |            |
| 38 | 48 | male   | 8,84   | 48  | 2  | 08.08.2020 |
| 38 |    | male   | 4,59   | 167 | 5  |            |
| 39 | 47 | female | 79,96  | 125 | 4  | 31.03.2020 |
| 39 |    | female | 33,56  | 247 | 8  |            |
| 40 | 58 | male   | 83,84  | 142 | 5  | 15.03.2020 |
| 40 |    | male   | 45,31  | 268 | 9  |            |
| 41 | 53 | female | 130,80 | 142 | 5  | 15.03.2020 |
| 41 |    | female | 58,83  | 268 | 9  |            |
| 42 | 52 | male   | 117,90 | 112 | 4  | 21.04.2020 |
| 42 |    | male   | 177,20 | 157 | 5  |            |
| 42 |    | male   | 69,07  | 275 | 9  |            |
| 43 | 25 | male   | 31,79  | 111 | 4  | 29.04.2020 |
| 43 |    | male   | 28,67  | 149 | 5  |            |
| 43 |    | male   | 10,70  | 267 | 9  |            |
| 44 | 44 | female | 63,82  | 113 | 4  | 20.04.2020 |
| 44 |    | female | 60,13  | 158 | 5  |            |
| 44 |    | female | 16,08  | 276 | 9  |            |
| 45 | 44 | female | 106,10 | 136 | 4  | 21.03.2020 |
| 45 |    | female | 51,35  | 264 | 9  |            |
| 46 | 47 | male   | 112,80 | 145 | 5  | 29.03.2020 |
| 46 |    | male   | 13,29  | 310 | 10 |            |
| 47 | 15 | male   | 18,90  | 112 | 4  | 01.05.2020 |

|    |    |        |        |     |    |            |
|----|----|--------|--------|-----|----|------------|
| 47 |    | male   | 3,91   | 277 | 9  |            |
| 48 | 59 | male   | 100,00 | 126 | 4  | 27.03.2020 |
| 48 |    | male   | 108,90 | 242 | 8  |            |
| 49 | 38 | female | 48,02  | 114 | 4  | 28.04.2020 |
| 49 |    | female | 8,97   | 277 | 9  |            |
| 50 | 43 | female | 89,91  | 151 | 5  | 16.03.2020 |
| 50 |    | female | 17,86  | 311 | 10 |            |
| 51 | 70 | male   | 77,96  | 123 | 4  | 29.03.2020 |
| 51 |    | male   | 136,60 | 184 | 6  |            |
| 51 |    | male   | 151,10 | 263 | 9  |            |
| 52 | 69 | female | 21,71  | 123 | 4  | 29.03.2020 |
| 52 |    | female | 16,43  | 184 | 6  |            |
| 52 |    | female | 8,43   | 263 | 9  |            |
| 53 | 47 | male   | 40,05  | 43  | 1  | 24.09.2020 |
| 53 |    | male   | 100,30 | 61  | 2  |            |
| 54 | 49 | female | 42,97  | 147 | 5  | 18.03.2020 |
| 54 |    | female | 18,02  | 309 | 10 |            |
| 55 | 11 | female | 189,80 | 184 | 6  | 12.04.2020 |
| 55 |    | female | 62,57  | 317 | 10 |            |
| 56 | 41 | female | 83,01  | 184 | 6  | 12.04.2020 |
| 56 |    | female | 12,86  | 317 | 10 |            |
| 57 | 52 | male   | 19,20  | 120 | 4  | 20.04.2020 |
| 57 |    | male   | 14,92  | 154 | 5  |            |
| 57 |    | male   | 5,40   | 285 | 9  |            |
| 58 | 12 | female | 139,10 | 188 | 6  | 18.03.2020 |
| 58 |    | female | 30,52  | 344 | 11 |            |
| 59 | 43 | female | 20,22  | 181 | 6  | 12.03.2020 |
| 59 |    | female | 2,11   | 350 | 11 |            |
| 60 | 45 | male   | 169,40 | 188 | 6  | 18.03.2020 |
| 60 |    | male   | 63,66  | 344 | 11 |            |
| 61 | 19 | female | 27,85  | 37  | 1  | 16.09.2020 |
| 61 |    | female | 81,91  | 64  | 2  |            |
| 62 | 59 | male   | 64,67  | 139 | 5  | 20.03.2020 |
| 62 |    | male   | 103,90 | 262 | 9  |            |
| 63 | 56 | female | 26,09  | 140 | 5  | 19.03.2020 |
| 63 |    | female | 9,10   | 263 | 9  |            |
| 64 | 62 | male   | 136,00 | 153 | 5  | 19.03.2020 |
| 64 |    | male   | 73,90  | 313 | 10 |            |
| 65 | 60 | female | 108,30 | 152 | 5  | 20.03.2020 |
| 65 |    | female | 69,13  | 312 | 10 |            |
| 66 | 67 | male   | 49,19  | 155 | 5  | 25.03.2020 |
| 66 |    | male   | 11,72  | 316 | 10 |            |
| 67 | 65 | female | 134,30 | 155 | 5  | 25.03.2020 |
| 67 |    | female | 89,68  | 316 | 10 |            |
| 68 | 38 | female | 82,01  | 119 | 4  | 21.04.2020 |
| 68 |    | female | 49,58  | 153 | 5  |            |
| 68 |    | female | 11,08  | 284 | 9  |            |
| 69 | 42 | female | 34,30  | 103 | 3  | 30.04.2020 |
| 69 |    | female | 5,35   | 242 | 8  |            |
| 70 | 64 | male   | 21,96  | 139 | 5  | 12.03.2020 |
| 70 |    | male   | 9,27   | 249 | 8  |            |
| 71 | 56 | female | 99,45  | 139 | 5  | 12.03.2020 |
| 71 |    | female | 66,72  | 249 | 8  |            |
| 72 | 49 | female | 75,30  | 119 | 4  | 24.04.2020 |
| 72 |    | female | 49,06  | 284 | 9  |            |
| 73 | 62 | male   | 70,12  | 220 | 7  | 02.03.2020 |
| 73 |    | male   | 28,80  | 361 | 12 |            |

|    |    |        |        |     |    |            |
|----|----|--------|--------|-----|----|------------|
| 74 | 61 | female | 33,57  | 220 | 7  | 02.03.2020 |
| 74 |    | female | 17,75  | 361 | 12 |            |
| 75 | 49 | female | 143,80 | 142 | 5  | 09.03.2020 |
| 75 |    | female | 48,11  | 252 | 8  |            |
| 76 | 15 | male   | 81,56  | 152 | 5  | 12.04.2020 |
| 76 |    | male   | 8,85   | 302 | 10 |            |
| 77 | 40 | male   | 85,25  | 153 | 5  | 11.04.2020 |
| 77 |    | male   | 18,85  | 303 | 10 |            |
| 78 | 10 | male   | 176,80 | 153 | 5  | 11.04.2020 |
| 78 |    | male   | 50,54  | 303 | 10 |            |
| 79 | 46 | female | 78,80  | 128 | 4  | 15.04.2020 |
| 79 |    | female | 32,83  | 286 | 9  |            |
| 80 | 62 | female | 41,12  | 151 | 5  | 10.04.2020 |
| 80 |    | female | 10,49  | 315 | 10 |            |
| 81 | 23 | male   | 30,46  | 137 | 5  | 20.03.2020 |
| 81 |    | male   | 10,90  | 214 | 7  |            |
| 81 |    | male   | 3,67   | 305 | 10 |            |
| 82 | 48 | male   | 127,40 | 137 | 5  | 20.03.2020 |
| 82 |    | male   | 91,53  | 214 | 7  |            |
| 82 |    | male   | 34,74  | 305 | 10 |            |
| 83 | 49 | female | 114,50 | 137 | 5  | 20.03.2020 |
| 83 |    | female | 78,12  | 214 | 7  |            |
| 83 |    | female | 31,43  | 305 | 10 |            |
| 84 | 57 | male   | 143,10 | 131 | 4  | 10.04.2020 |
| 84 |    | male   | 48,26  | 291 | 10 |            |
| 85 | 27 | male   | 45,00  | 70  | 2  | 22.04.2020 |
| 85 |    | male   | 195,50 | 204 | 7  |            |
| 86 | 33 | female | 26,40  | 19  | 1  | 15.10.2020 |
| 86 |    | female | 104,60 | 46  | 2  |            |
| 87 | 71 | male   | 69,47  | 130 | 4  | 15.03.2020 |
| 87 |    | male   | 101,00 | 228 | 8  |            |
| 88 | 53 | female | 37,63  | 65  | 2  | 25.04.2020 |
| 88 |    | female | 27,71  | 200 | 7  |            |
| 89 | 26 | female | 16,00  | 54  | 2  | 08.05.2020 |
| 89 |    | female | 9,89   | 188 | 6  |            |
| 90 | 65 | male   | 113,30 | 151 | 5  | 19.03.2020 |
| 90 |    | male   | 108,20 | 242 | 8  |            |
| 90 |    | male   | 47,43  | 334 | 11 |            |
| 91 | 45 | female | 83,14  | 81  | 3  | 10.04.2020 |
| 91 |    | female | 179,00 | 215 | 7  |            |
| 92 | 37 | male   | 73,45  | 141 | 5  | 26.03.2020 |
| 92 |    | male   | 82,06  | 303 | 10 |            |
| 93 | 11 | female | 88,77  | 137 | 5  | 20.04.2020 |
| 93 |    | female | 10,62  | 313 | 10 |            |
| 94 | 47 | female | 72,15  | 137 | 5  | 20.04.2020 |
| 94 |    | female | 46,00  | 313 | 10 |            |
| 95 | 47 | male   | 103,50 | 163 | 5  | 30.03.2020 |
| 95 |    | male   | 45,15  | 312 | 10 |            |
| 96 | 17 | female | 2,29   | 148 | 5  | 30.03.2020 |
| 96 |    | female | 1,27   | 238 | 8  |            |
| 96 |    | female | 0,57   | 325 | 11 |            |
| 97 | 44 | female | 17,45  | 148 | 5  | 30.03.2020 |
| 97 |    | female | 7,83   | 238 | 8  |            |
| 97 |    | female | 2,75   | 325 | 11 |            |
| 98 | 30 | female | 112,80 | 98  | 3  | 10.04.2020 |
| 98 |    | female | 149,70 | 152 | 5  |            |
| 99 | 65 | male   | 23,11  | 143 | 5  | 07.03.2020 |



|     |    |        |        |     |    |            |
|-----|----|--------|--------|-----|----|------------|
| 99  |    | male   | 23,11  | 244 | 8  |            |
| 100 | 53 | male   | 57,41  | 170 | 6  | 09.03.2020 |
| 100 |    | male   | 27,76  | 282 | 9  |            |
| 101 | 15 | male   | 37,57  | 170 | 6  | 08.03.2020 |
| 101 |    | male   | 6,94   | 331 | 11 |            |
| 102 | 4  | male   | 149,00 | 170 | 6  | 08.03.2020 |
| 102 |    | male   | 16,65  | 331 | 11 |            |
| 103 | 43 | female | 16,74  | 151 | 5  | 21.03.2020 |
| 103 |    | female | 2,22   | 318 | 10 |            |
| 104 | 51 | male   | 67,98  | 143 | 5  | 15.03.2020 |
| 104 |    | male   | 8,39   | 275 | 9  |            |
| 105 | 48 | female | 94,71  | 141 | 5  | 17.03.2020 |
| 105 |    | female | 180,00 | 273 | 9  |            |
| 106 | 17 | male   | 143,40 | 136 | 4  | 17.03.2020 |
| 106 |    | male   | 87,21  | 255 | 8  |            |
| 107 | 48 | male   | 121,90 | 105 | 3  | 17.04.2020 |
| 107 |    | male   | 63,66  | 224 | 7  |            |
| 108 | 45 | female | 124,40 | 105 | 3  | 17.04.2020 |
| 108 |    | female | 65,60  | 224 | 7  |            |
| 109 | 43 | female | 88,92  | 133 | 4  | 18.03.2020 |
| 109 |    | female | 69,42  | 190 | 6  |            |
| 109 |    | female | 46,52  | 252 | 8  |            |
| 110 | 73 | female | 94,52  | 133 | 4  | 26.03.2020 |
| 110 |    | female | 186,60 | 258 | 8  |            |
